# Supplementary material for: The Array of Antibacterial Action of Protocatechuic Acid Ethyl Ester and Erythromycin on Staphylococcal Strains
Source: MDPI journal article supplement (doi:10.3390/antibiotics11070848), 2022-06-24
Supplement: s1 [file s1]

*Staphylococcus aureus* ATCC 25923

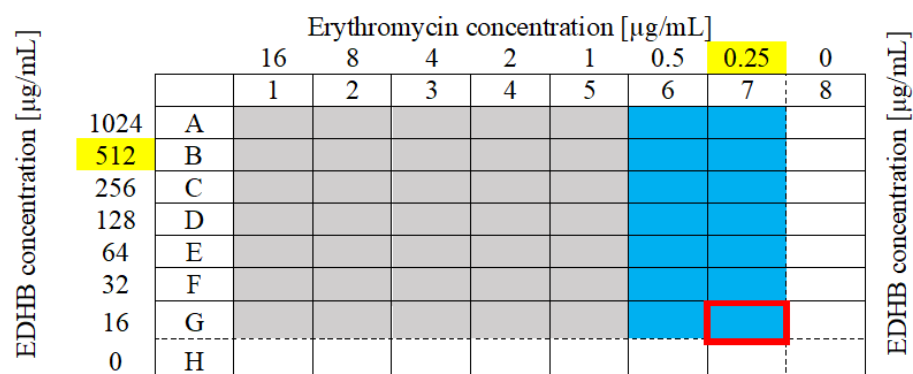

*Staphylococcus aureus* 1

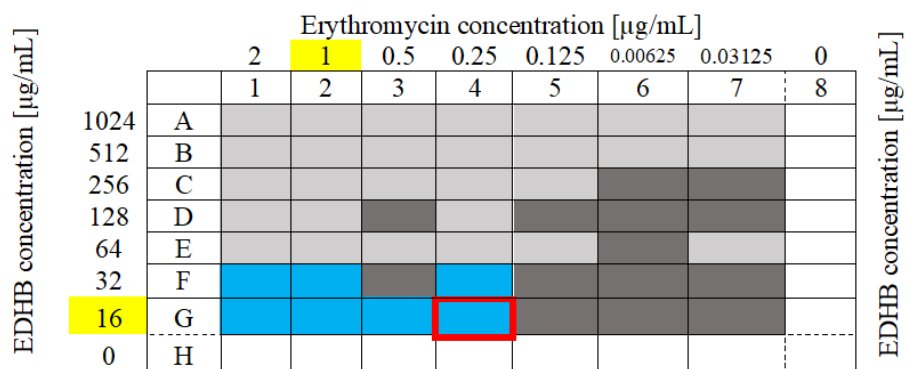

*Staphylococcus aureus* ATCC 43300

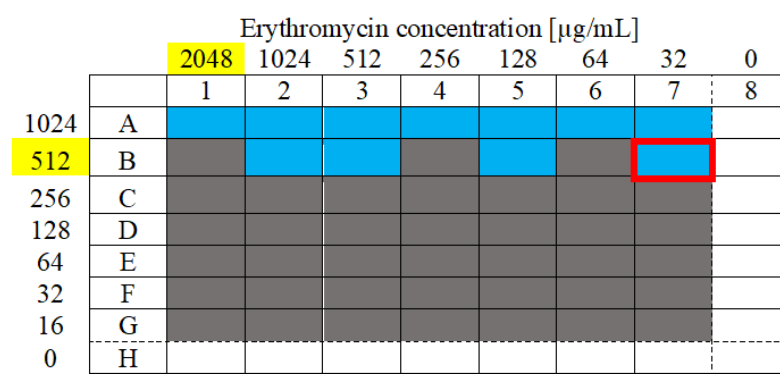

*Staphylococcus aureus* 2

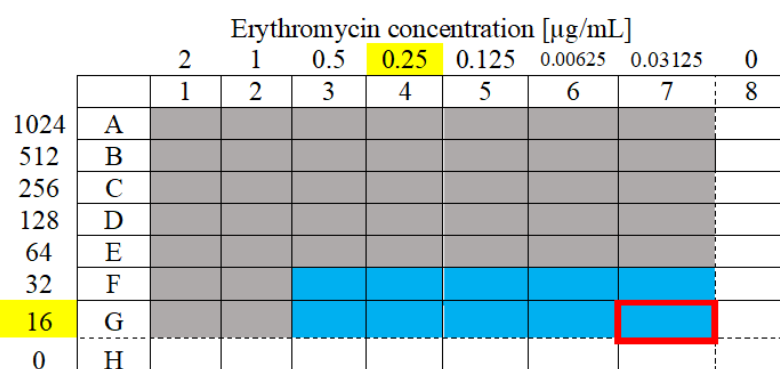

*Staphylococcus aureus* 3

|                            |      | Erythromycin concentration [μg/mL] |      |     |     |     |    |    |   |
|----------------------------|------|------------------------------------|------|-----|-----|-----|----|----|---|
|                            |      | 2048                               | 1024 | 512 | 256 | 128 | 64 | 32 | 0 |
| EDHB concentration [μg/mL] |      | 1                                  | 2    | 3   | 4   | 5   | 6  | 7  | 8 |
|                            | 1024 | A                                  |      |     |     |     |    |    |   |
|                            | 512  | B                                  |      |     |     |     |    |    |   |
|                            | 256  | C                                  |      |     |     |     |    |    |   |
|                            | 128  | D                                  |      |     |     |     |    |    |   |
|                            | 64   | E                                  |      |     |     |     |    |    |   |
|                            | 32   | F                                  |      |     |     |     |    |    |   |
|                            | 16   | G                                  |      |     |     |     |    |    |   |
|                            | 0    | H                                  |      |     |     |     |    |    |   |

*Staphylococcus aureus* 4

|                                         |      | Erythromycin concentration [ $\mu\text{g/mL}$ ] |      |     |     |     |    |    |   |
|-----------------------------------------|------|-------------------------------------------------|------|-----|-----|-----|----|----|---|
|                                         |      | 2048                                            | 1024 | 512 | 256 | 128 | 64 | 32 | 0 |
| EDHB concentration [ $\mu\text{g/mL}$ ] |      | 1                                               | 2    | 3   | 4   | 5   | 6  | 7  | 8 |
|                                         | 1024 | A                                               |      |     |     |     |    |    |   |
|                                         | 512  | B                                               |      |     |     |     |    |    |   |
|                                         | 256  | C                                               |      |     |     |     |    |    |   |
|                                         | 128  | D                                               |      |     |     |     |    |    |   |
|                                         | 64   | E                                               |      |     |     |     |    |    |   |
|                                         | 32   | F                                               |      |     |     |     |    |    |   |
|                                         | 16   | G                                               |      |     |     |     |    |    |   |
|                                         | 0    | H                                               |      |     |     |     |    |    |   |

*Staphylococcus epidermidis* ATCC 12228

|                            |      | Erythromycin concentration [μg/mL] |      |       |        |       |       |       |   |
|----------------------------|------|------------------------------------|------|-------|--------|-------|-------|-------|---|
|                            |      | 0.5                                | 0.25 | 0.125 | 0.0625 | 0.031 | 0.016 | 0.008 | 0 |
| EDHB concentration [μg/mL] |      | 1                                  | 2    | 3     | 4      | 5     | 6     | 7     | 8 |
|                            | 2048 | A                                  |      |       |        |       |       |       |   |
|                            | 1024 | B                                  |      |       |        |       |       |       |   |
|                            | 512  | C                                  |      |       |        |       |       |       |   |
|                            | 256  | D                                  |      |       |        |       |       |       |   |
|                            | 128  | E                                  |      |       |        |       |       |       |   |
|                            | 64   | F                                  |      |       |        |       |       |       |   |
|                            | 32   | G                                  |      |       |        |       |       |       |   |
|                            | 0    | H                                  |      |       |        |       |       |       |   |

*Staphylococcus epidermidis* ATCC 35984

|                                         |      | Erythromycin concentration [ $\mu\text{g/mL}$ ] |      |     |     |     |    |    |   |
|-----------------------------------------|------|-------------------------------------------------|------|-----|-----|-----|----|----|---|
|                                         |      | 2048                                            | 1024 | 512 | 256 | 128 | 64 | 32 | 0 |
| EDHB concentration [ $\mu\text{g/mL}$ ] |      | 1                                               | 2    | 3   | 4   | 5   | 6  | 7  | 8 |
|                                         | 2048 | A                                               |      |     |     |     |    |    |   |
|                                         | 1024 | B                                               |      |     |     |     |    |    |   |
|                                         | 512  | C                                               |      |     |     |     |    |    |   |
|                                         | 256  | D                                               |      |     |     |     |    |    |   |
|                                         | 128  | E                                               |      |     |     |     |    |    |   |
|                                         | 64   | F                                               |      |     |     |     |    |    |   |
|                                         | 32   | G                                               |      |     |     |     |    |    |   |
|                                         | 0    | H                                               |      |     |     |     |    |    |   |

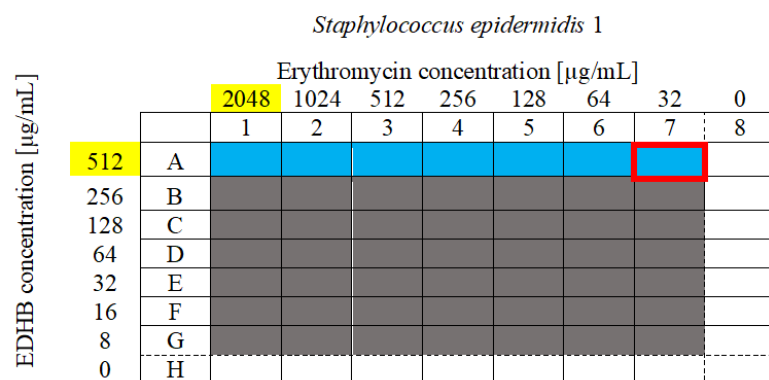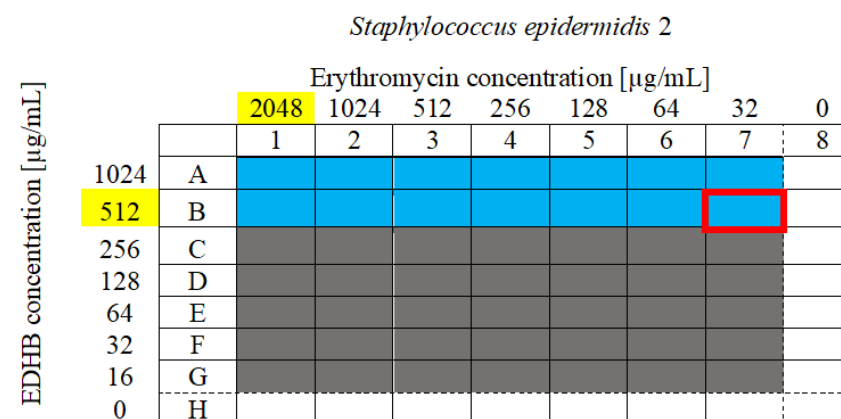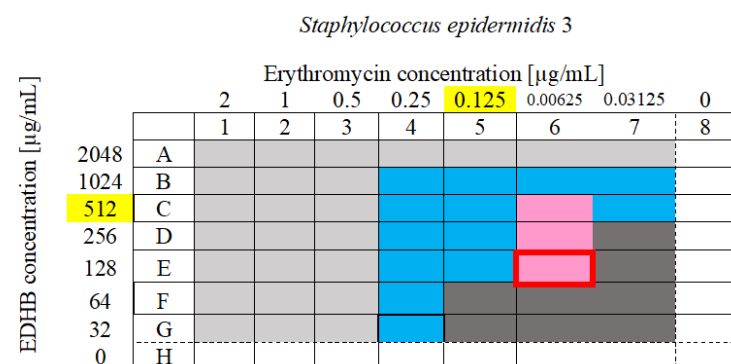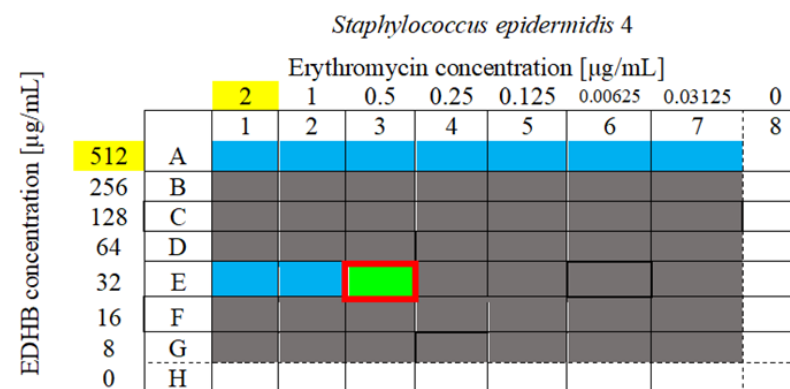

**Figure S1.** The checkerboard assay results for staphylococcal strains. The dark grey represents greater than 50% bacterial growth in a well, while the light grey shows smaller than 50% bacterial growth in a well compared to the growth control. The blue represents an indifferent, pink additive, while green synergistic interaction. The red framed box represents FIC index for each strain. The values highlighted in yellow show the MICs for EDHB and erythromycin.
